# Supplementary material for: Co3O4 Nanopetals Grown on the Porous CuO Network for the Photocatalytic Degradation
Source: MDPI journal article supplement (doi:10.3390/nano12162850), 2022-08-18
Supplement: s1 [file s1]

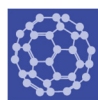

Supporting Information

# Co<sub>3</sub>O<sub>4</sub> Nanopetals Grown on the Porous CuO Network for the Photocatalytic Degradation

Yuntao Sun <sup>1</sup>, Can Wang <sup>1</sup>, Shengyao Qin <sup>1</sup>, Fengda Pan <sup>1,\*</sup>, Yongyan Li <sup>1,2</sup>, Zhifeng Wang <sup>1,2</sup> and Chunling Qin <sup>1,2,\*</sup>

<sup>1</sup> School of Materials Science and Engineering, Hebei University of Technology, Tianjin 300401, China

<sup>2</sup> Key Laboratory for New Type of Functional Materials in Hebei Province, Hebei University of Technology, Tianjin 300401, China

\* Correspondence: 202021801120@stu.hebut.edu.cn (F.P.); clqin@hebut.edu.cn (C.Q.)

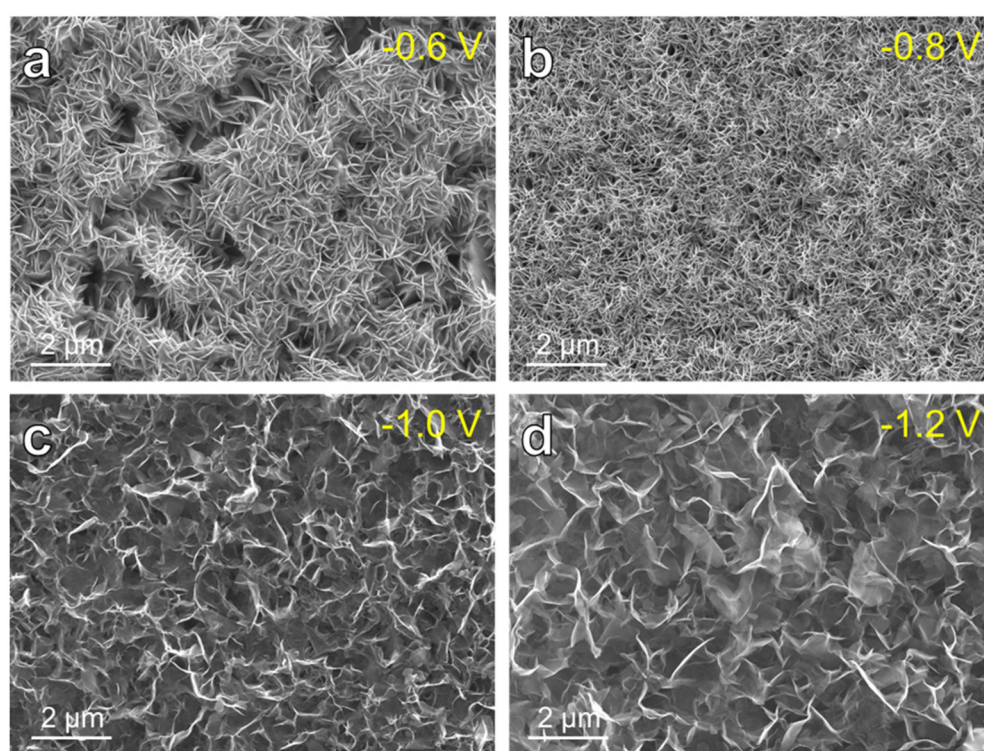

**Figure S1.** SEM images of deposition at voltage of -0.6 V (a), -0.8 V (b), -1.0 V (c) and -1.2 V (d).

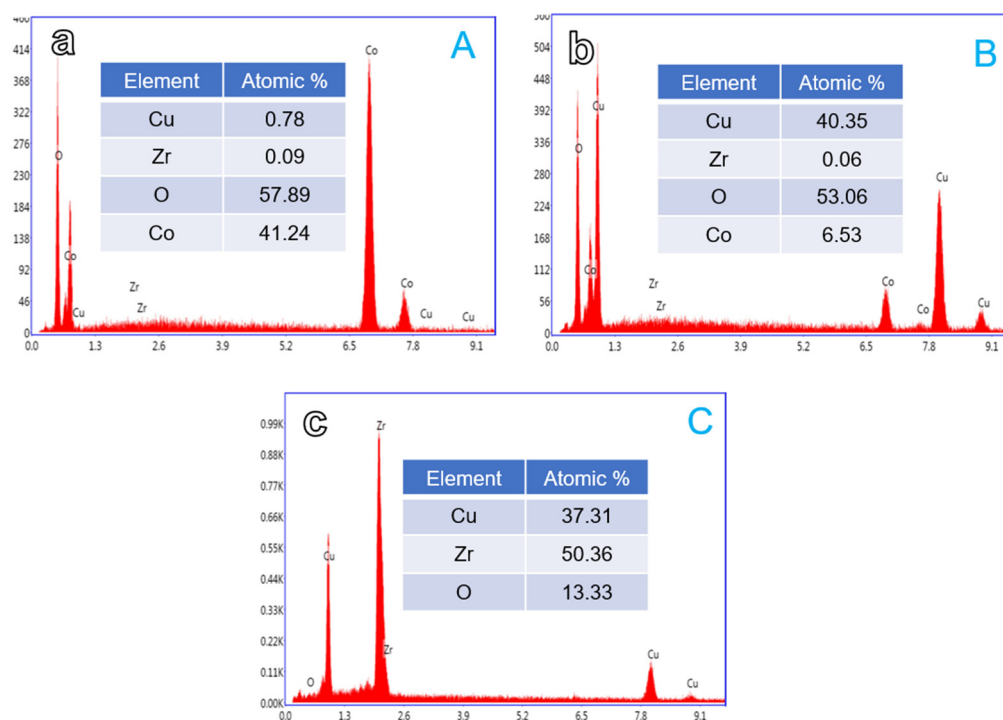

**Figure S2.** EDS analysis for the cross-sectional image of as-calcined ribbon: nanopetals layer (a), nanoporous layer (b), amorphous layer (c).

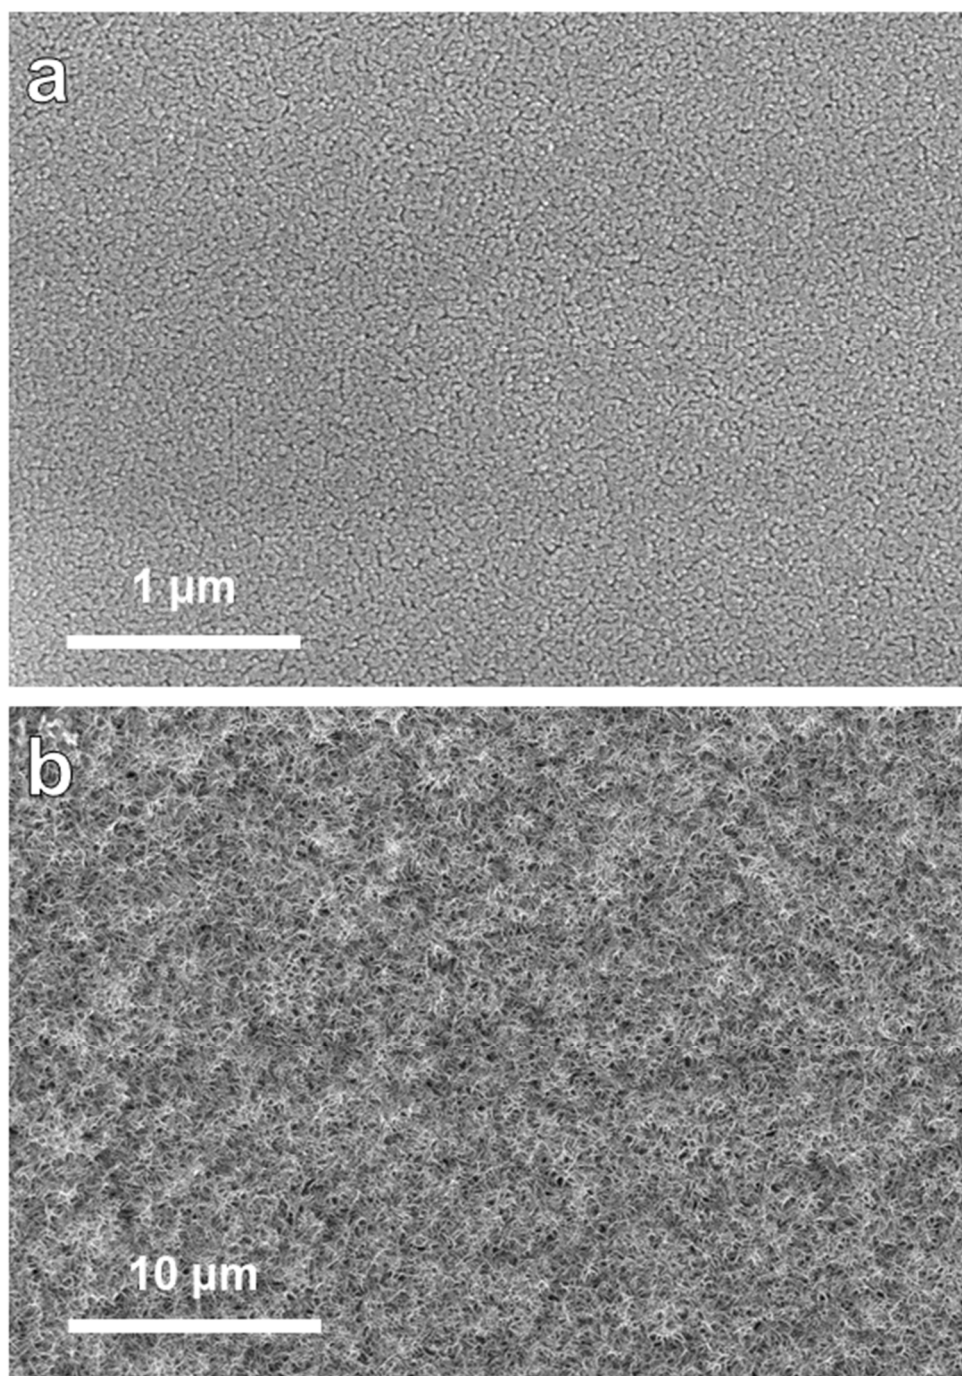

**Figure S3.** SEM images of a wide range of Cu<sub>40</sub>Zr<sub>60</sub> amorphous alloy ribbon dealloyed in 0.05 M HF for 2 h (a) and the composite sample via deposition at -0.8 V for 30 min followed by the calcination (b).

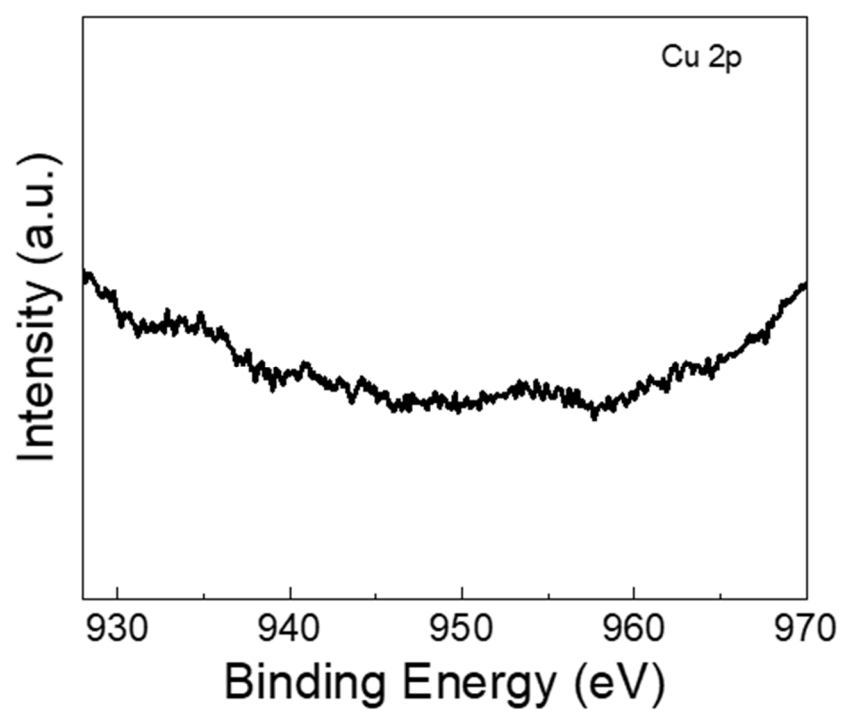

**Figure S4.** XPS spectrum of Cu 2p for nanopetals layer.
